# Supplementary material for: Metagenomic investigation of vestimentiferan tubeworm endosymbionts from Mid-Cayman Rise reveals new insights into metabolism and diversity
Source: Microbiome. 2018 Jan 27;6:19. doi: 10.1186/s40168-018-0411-x (PMC5787263; doi:10.1186/s40168-018-0411-x)
Supplement: Supplementary file 7 — Genes involved in major metabolic pathways, symbiont–host interactions, and protein secretion in MCR MAGs 1 and 2 in comparison with the Riftia, Tevnia, and Ridgeia symbiont metagenomes. Gene clusters were identified by ITEP and annotated with RAST. The last column indicates gene clusters only present in the MCR MAG bins (value =1). (XLSX 39 kb) [file 40168_2018_411_MOESM7_ESM.xlsx]

## Sheet: Sheet1
Metabolism	Clusterid	Annotation	Tevnia	Riftia1	Riftia2	Ridgeia1	Ridgeia2	MCR MAG1	MCR MAG2	Only present at MCR MAGs (1)
CARBON FIXATION
CBB
	132	phosphoribulokinase (ec 2.7.1.19)	1	1	1	1	1	1	1	0
	1582	ribulose bisphosphate carboxylase (ec 4.1.1.39)	1	1	1	1	0	1	1	0
Reductive TCA
	991	2-oxoglutarate oxidoreductase, alpha subunit (ec 1.2.7.3)	1	1	1	1	1	1	1	0
	992	2-oxoglutarate oxidoreductase, beta subunit (ec 1.2.7.3)	1	1	1	1	1	1	1	0
	2061	2-oxoglutarate oxidoreductase, gamma subunit (ec 1.2.7.3)	1	1	1	1	1	0	0	0
	2413	2-oxoglutarate oxidoreductase, delta subunit, putative (ec 1.2.7.3)	1	1	1	1	1	0	0	0
	989	trap-type c4-dicarboxylate transport system, small permease component	1	1	1	1	1	1	1	0
	77	trap-type c4-dicarboxylate transport system, large permease component	1	1	1	1	1	1	1	0
HETEROTROPHY
PTS
	958	phosphoenolpyruvate-protein phosphotransferase of pts system (ec 2.7.3.9)	1	1	1	1	1	1	1	0
Glycolysis
	788	glucose-6-phosphate isomerase (ec 5.3.1.9)	1	1	1	1	1	1	1	0
	93	6-phosphofructokinase (ec 2.7.1.11)	1	1	1	1	1	1	1	0
	1353	triosephosphate isomerase (ec 5.3.1.1)	1	1	1	1	1	1	1	0
	2337	fructose-bisphosphate aldolase class i (ec 4.1.2.13)	1	1	1	1	1	0	0	0
	5389	fructose-bisphosphate aldolase class i (ec 4.1.2.13)	0	0	0	0	0	0	1	0
	1271	fructose-bisphosphate aldolase class ii (ec 4.1.2.13)	1	1	1	1	1	1	1	0
	6677	putative fructose 1,6-bisphosphate aldolase( ec:4.1.2.13 )	0	0	0	0	0	1	0	0
	1508	non-phosphorylating glyceraldehyde-3-phosphate dehydrogenase (nadp) (ec 1.2.1.9)	1	1	1	1	1	1	0	0
	1464	nad-dependent glyceraldehyde-3-phosphate dehydrogenase (ec 1.2.1.12)	1	1	1	1	0	1	1	0
	1159	enolase (ec 4.2.1.11)	1	1	1	1	1	1	1	0
	1270	pyruvate kinase (ec 2.7.1.40)	1	1	1	1	1	1	1	0
	43	phosphoenolpyruvate synthase (ec 2.7.9.2)	1	1	1	1	1	1	1	0
Krebbs
	35	citrate synthase (si) (ec 2.3.3.1)	1	1	1	1	1	1	1	0
FORMATE OXIDATION
	3218	nad-dependent formate dehydrogenase alpha subunit	0	0	0	0	0	1	1	1
SULFUR OXIDATION
	53	dissimilatory sulfite reductase, alpha subunit (ec 1.8.99.3)	1	1	1	1	1	1	1	0
	103	dissimilatory sulfite reductase, beta subunit (ec 1.8.99.3)	1	1	1	1	1	1	1	0
	3586	dissimilatory sulfite reductase, gamma subunit (ec 1.8.99.3)	0	0	0	0	0	1	1	1
	840	sulfur oxidation protein soxa	1	1	1	1	1	1	1	0
	837	sulfur oxidation protein soxb	1	1	1	1	1	1	1	0
	841	sulfur oxidation protein soxx	1	1	1	1	1	1	1	0
	118	sulfur oxidation protein soxy	1	1	1	1	1	1	1	0
	117	sulfur oxidation protein soxz	1	1	1	1	1	1	1	0
NITRATE REDUCTION
	215	assimilatory nitrate reductase large subunit (ec:1.7.99.4)	1	1	1	1	1	1	1	0
	580	ferredoxin-type protein napg (periplasmic nitrate reductase)	1	1	1	1	1	1	1	0
	578	nitrate reductase cytochrome c550-type subunit	1	1	1	1	1	1	1	0
	213	periplasmic nitrate reductase precursor (ec 1.7.99.4)	1	1	1	1	1	1	1	0
	579	polyferredoxin naph (periplasmic nitrate reductase)	1	1	1	1	1	1	1	0
	7277	respiratory nitrate reductase alpha chain (ec 1.7.99.4)	0	1	0	0	0	0	0	0
	1969	respiratory nitrate reductase alpha chain (ec 1.7.99.4)	1	1	1	1	1	0	0	0
	1729	respiratory nitrate reductase beta chain (ec 1.7.99.4)	1	1	1	1	1	0	0	0
	2407	respiratory nitrate reductase delta chain (ec 1.7.99.4)	1	1	1	1	1	0	0	0
	2406	respiratory nitrate reductase gamma chain (ec 1.7.99.4)	1	1	1	1	1	0	0	0
	3827	respiratory nitrate reductase subunit, conjectural (ec 1.7.99.4)	0	0	1	0	1	0	0	0
	179	cytochrome cd1 nitrite reductase (ec:1.7.2.1)	1	1	1	1	1	1	1	0
	800	nitrite reductase [nad(p)h] small subunit (ec 1.7.1.4)	1	1	1	1	1	1	1	0
	474	nitrite reductase [nad(p)h] large subunit (ec 1.7.1.4)	1	1	1	1	1	1	1	0
	176	nitrite reductase associated c-type cytochorome nirn	1	1	1	1	1	1	1	0
	3603	nitrite reductase probable [nad(p)h] subunit (ec 1.7.1.4)	0	0	0	0	0	1	1	1
	710	nitric oxide reductase activation protein nord	1	1	1	1	1	1	1	0
	339	nitric oxide reductase activation protein nore	1	1	1	1	1	1	1	0
	79	nitrous oxide reductase maturation protein nosd	1	1	1	1	1	1	1	0
	247	nitrous oxide reductase maturation protein nosf (atpase)	1	1	1	1	1	1	1	0
	899	nitrous oxide reductase maturation protein, outer-membrane lipoprotein nosl	1	1	1	1	1	1	1	0
	900	nitrous oxide reductase maturation transmembrane protein nosy	1	1	1	1	1	1	1	0
NITRATE ASSIMILATION
	2951	ferredoxin-dependent glutamate synthase (ec 1.4.7.1)	0	1	0	1	1	0	0	0
	3036	ferredoxin-dependent glutamate synthase (ec 1.4.7.1)	1	1	1	0	0	0	0	0
	1212	glutamate n-acetyltransferase (ec 2.3.1.35) / n-acetylglutamate synthase (ec 2.3.1.1)	1	1	1	1	1	1	1	0
	1180	glutamate synthase [nadph] large chain (ec 1.4.1.13)	1	1	1	1	1	1	1	0
	314	glutamate synthase [nadph] small chain (ec 1.4.1.13)	1	1	1	1	1	1	1	0
	279	n-acetylglutamate synthase (ec 2.3.1.1)	1	1	1	1	1	1	1	0
	973	protein similar to glutamate synthase [nadph] small chain, clustered with sulfite reductase	1	1	1	1	1	1	1	0
OXIDATION OF HYDROGEN
	2183	[nife] hydrogenase metallocenter assembly protein hypc	1	1	1	1	1	0	0	0
	4336	[nife] hydrogenase metallocenter assembly protein hypc	0	0	0	0	0	1	1	1
	4335	[nife] hydrogenase metallocenter assembly protein hypd	0	0	0	0	0	1	1	1
	2182	[nife] hydrogenase metallocenter assembly protein hypd	1	1	1	1	1	0	0	0
	2181	[nife] hydrogenase metallocenter assembly protein hype	1	1	1	1	1	0	0	0
	4334	[nife] hydrogenase metallocenter assembly protein hype	0	0	0	0	0	1	1	1
	5637	[nife] hydrogenase metallocenter assembly protein hypf	0	0	0	0	1	0	0	0
	1475	[nife] hydrogenase metallocenter assembly protein hypf	1	1	1	1	0	1	1	0
	4338	[nife] hydrogenase nickel incorporation protein hypa	0	0	0	0	0	1	1	1
	2185	[nife] hydrogenase nickel incorporation protein hypa	1	1	1	1	1	0	0	0
	4337	[nife] hydrogenase nickel incorporation-associated protein hypb	0	0	0	0	0	1	1	1
	2184	[nife] hydrogenase nickel incorporation-associated protein hypb	1	1	1	1	1	0	0	0
	3486	nad-reducing hydrogenase subunit hoxf (ec 1.12.1.2)	0	0	0	0	0	1	1	1
	3773	nad-reducing hydrogenase subunit hoxh (ec 1.12.1.2)	0	0	0	0	0	1	1	1
	3485	nad-reducing hydrogenase subunit hoxu (ec 1.12.1.2)	0	0	0	0	0	1	1	1
	3940	nad-reducing hydrogenase subunit hoxy (ec 1.12.1.2)	0	0	0	0	0	1	1	1
	115	uptake hydrogenase large subunit (ec 1.12.99.6)	1	1	1	1	1	1	1	0
	755	uptake hydrogenase small subunit precursor (ec 1.12.99.6)	1	1	1	1	1	1	1	0
ABC TRANSPORTER
	57	phosphonate abc transporter phosphate-binding periplasmic component (tc 3.a.1.9.1)	1	1	1	1	1	0	0	0
	241	ferric iron abc transporter, atp-binding protein	1	1	1	1	1	1	1	0
	243	uncharacterized abc transporter, atp-binding protein yrbf	1	1	1	1	1	1	1	0
	245	zinc abc transporter, atp-binding protein znuc	1	1	1	1	1	1	1	0
	246	abc transporter involved in cytochrome c biogenesis, atpase component ccma	1	1	1	1	1	1	1	0
	248	abc transporter, atp-binding protein	1	1	1	1	1	1	1	0
	251	cog0488: atpase components of abc transporters with duplicated atpase domains	1	1	1	1	1	1	1	0
	252	abc transporter, atp-binding protein	1	1	1	1	1	1	1	0
	255	lipopolysaccharide abc transporter, atp-binding protein lptb	1	1	1	1	1	1	1	0
	273	uncharacterized abc transporter, periplasmic component yrbd	1	1	1	1	1	1	1	0
	274	uncharacterized abc transporter, permease component yrbe	1	1	1	1	1	1	1	0
	331	zinc abc transporter, periplasmic-binding protein znua	1	1	1	1	1	1	1	0
	358	molybdenum abc transporter, periplasmic molybdenum-binding protein moda (tc 3.a.1.8.1)	1	1	1	1	1	1	1	0
	563	ferric iron abc transporter, iron-binding protein	1	1	1	1	1	1	1	0
	862	zinc abc transporter, inner membrane permease protein znub	1	1	1	1	1	1	1	0
	890	abc transporter involved in cytochrome c biogenesis, ccmb subunit	1	1	1	1	1	1	1	0
	1129	vitamin b12 abc transporter, b12-binding component btuf	1	1	1	1	1	1	1	0
	1399	ybbl abc transporter atp-binding protein	1	1	1	1	0	1	1	0
	1476	ferric iron abc transporter, permease protein	1	1	1	1	0	1	1	0
	1482	phosphate abc transporter, periplasmic phosphate-binding protein psts (tc 3.a.1.7.1)	1	1	1	1	1	0	1	0
	1528	phosphate abc transporter, periplasmic phosphate-binding protein psts (tc 3.a.1.7.1)	1	0	1	1	1	1	1	0
	1589	vitamin b12 abc transporter, permease component btuc	1	1	0	1	1	1	1	0
	1658	abc transporter, permease protein	1	1	1	1	1	1	0	0
	1753	vitamin b12 abc transporter, atpase component btud	1	0	0	1	1	1	1	0
	1754	abc transporter, atp-binding protein	1	1	1	1	1	0	0	0
	1759	nitrate abc transporter, atp-binding protein	1	1	1	1	1	0	0	0
	1760	methionine abc transporter atp-binding protein	1	1	1	1	1	0	0	0
	1782	uncharacterized abc transporter, permease component yrbe	1	1	1	1	1	0	0	0
	1813	abc transporter, permease protein	1	1	1	1	1	0	0	0
	2068	dipeptide-binding abc transporter, periplasmic substrate-binding component (tc 3.a.1.5.2)	1	1	1	1	1	0	0	0
	2658	nitrate abc transporter, atp-binding protein	1	0	1	1	1	0	0	0
	2660	abc transporter atp-binding protein	1	1	1	1	0	0	0	0
	2675	urea abc transporter, substrate binding protein urta	1	1	1	1	0	0	0	0
	2701	methionine abc transporter atp-binding protein	1	1	1	1	0	0	0	0
	2711	phosphate abc transporter, periplasmic phosphate-binding protein psts (tc 3.a.1.7.1)	0	0	0	0	0	1	1	1
	2763	nitrate abc transporter, permease protein	1	1	0	1	1	0	0	0
	2814	nitrate abc transporter, nitrate-binding protein	1	0	1	1	1	0	0	0
	2898	branched-chain amino acid abc transporter, amino acid-binding protein (tc 3.a.1.4.1)	0	0	0	0	0	1	1	1
	3252	glycerol-3-phosphate abc transporter, permease protein ugpa (tc 3.a.1.1.3)	0	0	0	0	0	1	1	1
	3261	abc transporter atp-binding protein uup	0	0	0	0	0	1	1	1
	3265	branched-chain amino acid abc transporter, atp-binding protein	0	0	0	0	0	1	1	1
	3266	abc transporter, atp-binding protein	0	0	0	0	0	1	1	1
	3271	oligopeptide/dipeptide abc transporter, atp-binding protein	0	0	0	0	0	1	1	1
	3272	abc transporter, atp-binding protein	0	0	0	0	0	1	1	1
	3275	nucleoside abc transporter, atp-binding protein	0	0	0	0	0	1	1	1
	3298	uncharacterized abc transporter, auxiliary component yrbc	0	0	0	0	0	1	1	1
	3314	glycerol-3-phosphate abc transporter, permease protein ugpe (tc 3.a.1.1.3)	0	0	0	0	0	1	1	1
	3400	branched-chain amino acid abc transporter, amino acid-binding protein (tc 3.a.1.4.1)	0	0	0	0	0	1	1	1
	3401	branched-chain amino acid abc transporter, periplasmic substrate- binding protein	0	0	0	0	0	1	1	1
	3621	phosphate abc transporter, periplasmic phosphate-binding protein psts (tc 3.a.1.7.1)	0	0	0	0	0	1	1	1
	3731	possible abc transporter subunit	0	0	0	0	0	1	1	1
	3837	abc transporter, permease protein	0	0	0	0	0	1	1	1
	3889	branched-chain amino acid abc transporter, amino acid-binding protein (tc 3.a.1.4.1)	0	0	0	0	0	1	1	1
	3890	putative abc transporter protein	0	0	0	0	0	1	1	1
	3929	abc transporter atp-binding protein	0	0	0	0	0	1	1	1
	3954	abc transporter permease protein	0	0	0	0	0	1	1	1
	4019	peptide abc transporter, permease component	0	0	0	0	0	1	1	1
	4022	dipeptide-binding abc transporter, periplasmic substrate-binding component (tc 3.a.1.5.2)	0	0	0	0	0	1	1	1
	4026	abc transporter, permease protein, putative	0	0	0	0	0	1	1	1
	4181	nucleoside abc transporter, permease protein 2	0	0	0	0	0	1	1	1
	4182	nucleoside abc transporter, permease protein 1	0	0	0	0	0	1	1	1
	4192	abc transporter, periplasmic substrate-binding protein	0	0	0	0	0	1	1	1
	4237	spermidine putrescine abc transporter permease component potc (tc_3.a.1.11.1)	0	0	0	0	0	1	1	1
	4238	abc transporter, periplasmic spermidine putrescine-binding protein potd (tc 3.a.1.11.1)	0	0	0	0	0	1	1	1
	4532	nitrate abc transporter, permease protein	0	0	0	1	1	0	0	0
	4851	methionine abc transporter atp-binding protein	0	0	0	0	0	0	1	0
	4854	abc transporter, atp-binding/permease protein	0	0	0	0	0	1	0	0
	4856	abc transporter, atp-binding protein	0	0	0	0	0	1	0	0
	4858	ferric iron abc transporter, atp-binding protein	0	1	0	0	0	0	0	0
	5004	molybdenum abc transporter, periplasmic molybdenum-binding protein moda (tc 3.a.1.8.1)	0	0	0	0	0	0	1	0
	5224	ferric iron abc transporter, permease protein	0	0	0	0	1	0	0	0
	5242	phosphate abc transporter, periplasmic phosphate-binding protein psts (tc 3.a.1.7.1)	0	0	0	0	0	1	0	0
	5250	amino acid abc transporter, permease protein	0	0	0	0	0	1	0	0
	5251	arginine abc transporter, permease protein artq	0	0	0	0	0	1	0	0
	5360	abc transporter substrate-binding protein	0	0	0	0	0	0	1	0
	5532	zinc abc transporter, inner membrane permease protein znub	0	1	0	0	0	0	0	0
	5535	phosphate abc transporter, periplasmic phosphate-binding protein psts (tc 3.a.1.7.1)	0	1	0	0	0	0	0	0
	5678	abc transporter, permease protein	0	0	0	0	0	1	0	0
	5727	thiamin abc transporter, transmembrane component	0	0	0	0	0	0	1	0
	5891	abc transporter, substrate binding protein	0	0	0	0	0	0	1	0
	5957	vitamin b12 abc transporter, permease component btuc	0	0	1	0	0	0	0	0
	6131	cog0488: atpase components of abc transporters with duplicated atpase domains	0	0	0	0	0	0	1	0
	6175	branched-chain amino acid abc transporter, amino acid-binding protein (tc 3.a.1.4.1)	0	0	0	0	0	0	1	0
	6291	l-proline glycine betaine binding abc transporter protein prox (tc 3.a.1.12.1)	0	0	0	0	0	1	0	0
	6342	amino-acid abc transporter binding protein	1	0	0	0	0	0	0	0
	6393	phosphonate abc transporter phosphate-binding periplasmic component (tc 3.a.1.9.1)	0	0	0	0	0	1	0	0
	6535	abc transporter atp-binding protein	0	0	0	0	0	1	0	0
	7341	urea abc transporter, substrate binding protein urta	0	0	0	0	1	0	0	0
OXIDATIVE STRESS RESPONSE
	1104	superoxide dismutase [fe] (ec 1.15.1.1)	1	1	1	1	1	1	1	0
	757	alkyl hydroperoxide reductase subunit c-like protein	1	1	1	1	1	1	1	0
	310	thioredoxin reductase (ec 1.8.1.9)	1	1	1	1	1	1	1	0
	3881	catalase (ec 1.11.1.6)	0	0	0	0	0	1	1	1
HOST INFECTION, ENVIRONMENTAL DEFENSE, SECRETION SYSTEM
	6754	abc-type antimicrobial peptide transport system, permease component	0	0	0	0	0	1	0	0
	5596	abc-type antimicrobial peptide transport system, permease component	0	0	0	0	0	0	1	0
	2611	abc-type antimicrobial peptide transport system, permease component	1	1	1	1	1	0	0	0
	5729	abc-type fe3+ transport system, periplasmic component	0	0	0	0	0	0	1	0
	250	abc-type multidrug transport system, atpase component	1	1	1	1	1	1	1	0
	1087	abc-type multidrug transport system, permease component	1	1	1	1	1	1	1	0
	4100	abc-type nitrate/sulfonate/bicarbonate transport systems, periplasmic components	0	0	0	0	0	1	1	1
	3766	abc-type phosphate/phosphonate transport system periplasmic component	0	0	0	0	0	1	1	1
	2882	abc-type polar amino acid transport system, atpase component	0	0	0	0	0	1	1	1
	2165	abc-type transport system involved in multi-copper enzyme maturation, permease component	1	1	1	1	1	0	0	0
	4275	abc-type transport system involved in multi-copper enzyme maturation, permease component	0	0	0	0	0	1	1	1
	1780	abc-type transport system involved in resistance to organic solvents, permease component	1	1	1	1	1	0	0	0
	1812	abc-type transport system, involved in lipoprotein release, permease component	1	1	1	1	1	0	0	0
	3263	abc-type tungstate transport system, atp-binding protein	0	0	0	0	0	1	1	1
	3743	abc-type tungstate transport system, periplasmic binding protein	0	0	0	0	0	1	1	1
	3741	abc-type tungstate transport system, permease protein	0	0	0	0	0	1	1	1
	201	autolysis response regulater lytr	1	1	1	1	1	1	1	0
	5572	autotransporter adhesin	0	0	0	0	0	1	0	0
	23	cation/multidrug efflux pump	1	1	1	1	1	1	1	0
	2659	cyclolysin secretion atp-binding protein	1	0	1	1	1	0	0	0
	3507	exopolysaccharide production protein pss	0	0	0	0	0	1	1	1
	426	general secretion pathway protein a	1	1	1	1	1	0	1	0
	3494	general secretion pathway protein a	0	0	0	0	0	1	1	1
	2103	general secretion pathway protein b, putative	1	1	1	1	1	0	0	0
	2821	general secretion pathway protein c	1	1	0	1	1	0	0	0
	3580	general secretion pathway protein d	0	0	0	0	0	1	1	1
	1463	general secretion pathway protein d	1	1	1	1	1	0	1	0
	1893	general secretion pathway protein e	1	1	1	1	0	0	1	0
	1894	general secretion pathway protein e	1	1	1	1	1	0	0	0
	5892	general secretion pathway protein f	0	0	0	0	0	1	0	0
	1462	general secretion pathway protein f	1	1	1	1	1	0	1	0
	1028	general secretion pathway protein g	1	1	1	1	1	1	1	0
	3953	general secretion pathway protein h	0	0	0	0	0	1	1	1
	2134	general secretion pathway protein h	1	1	1	1	1	0	0	0
	2097	general secretion pathway protein i	1	1	1	1	1	0	0	0
	4159	general secretion pathway protein i	0	0	0	0	0	1	1	1
	2096	general secretion pathway protein j	1	1	1	1	1	0	0	0
	4160	general secretion pathway protein j	0	0	0	0	0	1	1	1
	4091	general secretion pathway protein k	0	0	0	0	0	1	1	1
	2094	general secretion pathway protein k	1	1	1	1	1	0	0	0
	2135	general secretion pathway protein l	1	1	1	1	1	0	0	0
	4162	general secretion pathway protein l	0	0	0	0	0	1	1	1
	2092	general secretion pathway protein m	1	1	1	1	1	0	0	0
	4163	general secretion pathway protein m	0	0	0	0	0	1	1	1
	2608	general secretion pathway protein n	1	1	1	1	1	0	0	0
	4164	general secretion pathway protein n	0	0	0	0	0	1	1	1
	5133	hemolysin activation/secretion protein	0	0	0	0	0	1	0	0
	5188	hlyd family secretion protein	0	0	1	0	0	0	0	0
	2914	hlyd family secretion protein	1	0	0	1	1	0	0	0
	1847	membrane fusion protein of rnd family multidrug efflux pump	1	1	1	1	1	0	0	0
	3763	membrane fusion protein of rnd family multidrug efflux pump	0	0	0	0	0	1	1	1
	7207	probable outer membrane secretion protein - rhodobacter capsulatus	1	0	0	0	0	0	0	0
	4753	rnd multidrug efflux membrane fusion protein mexe precursor	0	0	0	0	0	0	1	0
	3470	rnd multidrug efflux transporter; acriflavin resistance protein	0	0	0	0	0	1	1	1
	1850	rnd multidrug efflux transporter; acriflavin resistance protein	1	1	1	1	1	0	0	0
	5979	secretion activator protein	0	0	0	0	0	0	1	0
	3171	secretion protein hlyd precursor	0	0	0	0	0	1	1	1
	3170	type i secretion system, outer membrane component lape # agga	0	0	0	0	0	1	1	1
	4857	type i secretion system atpase, lssb family lapb	0	0	0	0	0	1	0	0
	3569	type i secretion system, membrane fusion protein lapc	0	0	0	0	0	1	1	1
	3262	type i secretion system atpase, lssb family lapb	0	0	0	0	0	1	1	1
	184	type i secretion outer membrane protein, tolc precursor	1	1	1	1	1	1	1	0
	3281	type i secretion outer membrane protein, tolc precursor	0	0	0	0	0	1	1	1
	184	type i secretion outer membrane protein, tolc precursor	1	1	1	1	1	1	1	0
	3262	type i secretion system atpase, lssb family lapb	0	0	0	0	0	1	1	1
	3569	type i secretion system, membrane fusion protein lapc	0	0	0	0	0	1	1	1
	3170	type i secretion system, outer membrane component lape # agga	0	0	0	0	0	1	1	1
	3512	type ii and iii secretion system family protein	0	0	0	0	0	1	1	1
	2381	type ii secretion envelope pseudopilin protein (pulg,guides folded protein to puld in outer membrane)	1	1	1	1	1	0	0	0
	1896	type ii secretion pathway protein d homolog	1	1	1	1	1	0	0	0
	4158	type ii secretion system protein	0	0	0	1	1	0	0	0
	2682	type ii secretion system protein d; signal peptide	1	0	1	1	1	0	0	0
	1895	type ii secretion system protein e	1	1	1	1	1	0	0	0
	7218	hpap protein; type iii secretion protein (yscp)	0	1	0	0	0	0	0	0
	4559	vgrg protein	0	0	0	1	1	0	0	0
